# Supplementary material for: Cannabis use and perceptions among Canadians with Spinal Cord Injury
Source: Research Square preprint supplement (doi:10.21203/rs.3.rs-2838246/v1), 2023-06-16
Supplement: Supplementary file 1 [file 4e13e57474bcaa6fb38a6b9a.pdf]

*Table 1: Relationships between demographic and clinical characteristics and cannabis use after injury*

| Variable                              | Use Since Injury<br>Count(%) | Daily Use<br>Count(%) | Not using<br>Since Injury<br>Count(%) |
|---------------------------------------|------------------------------|-----------------------|---------------------------------------|
| <b>Gender</b>                         |                              |                       |                                       |
| Female, n (%)                         | 11(32.4)                     | 5(27.7)               | 19(41.3)                              |
| Male, n (%)                           | 22(64.7)                     | 12(66.7)              | 27(58.7)                              |
| Missing, n (%)                        | 1(2.9)                       | 1(5.6)                | 0                                     |
| <b>Employment status</b>              |                              |                       |                                       |
| Employed- Full-time, n (%)            | 3(8.8)                       | 2(11.1)               | 8(17.4)                               |
| Employed-Part time, n (%)             | 6(17.6)                      | 4(22.2)               | 2(4.3)                                |
| Not employed, n (%)                   | 10(29.5)                     | 7(38.9)               | 16(34.8)                              |
| Retired, n (%)                        | 15(44.1)                     | 5(27.8)               | 20(43.5)                              |
| <b>Education</b>                      |                              |                       |                                       |
| Advanced degree                       | 2(5.9)                       | 1(5.6)                | 5(10.9)                               |
| Post-secondary degree                 | 20(58.9)                     | 9(50.0)               | 26(56.5)                              |
| Secondary school graduation           | 10(29.4)                     | 7(38.8)               | 13(28.3)                              |
| Less than secondary school graduation | 1(2.9)                       | 0                     | 2(4.3)                                |
| Missing                               | 1(2.9)                       | 1(5.6)                | 0                                     |

# Appendix 1: questionnaire

## Cannabis Use and Perceptions Among Canadians with Spinal Cord Injury

Demographics

What is your current age?

(years)

Sex

☐ Female

☐ Male

☐ Prefer not to say

☐ Other

What was your age at the time of your injury?

\*Age of injury cannot be later than current age

What was the cause of your injury?

What is the level of your injury?

☐ Cervical (C1 - C8)

☐ Thoracic (T1 - T12)

☐ Lumbar (L1 - L5)

☐ Unknown

What is your AIS Score?

☐ AIS A (complete)

☐ AIS B

☐ AIS C

☐ AIS D

☐ Unknown

What is your level of education?

☐ Less than secondary school graduation

☐ Secondary school graduation

☐ Post-secondary degree

☐ Advanced degree

What is your current employment status?

☐ Currently employed - Full time

☐ Currently employed - Part time

☐ Not currently employed

☐ Retired

## Pre-injury Cannabis Use

Did you ever use cannabis prior to your injury?

- ☐ Yes  
☐ No

Prior to your injury, how often did you use cannabis?

- ☐ Daily  
☐ Weekly  
☐ Monthly  
☐ Rarely (less than once per month)

Prior to your injury, for what purpose did you use cannabis?

- ☐ Recreation / Enjoyment  
☐ Reducing Pain  
☐ Reducing Spasticity  
☐ Reducing Nausea  
☐ Reducing Stress / Anxiety  
☐ Reducing Depression  
☐ Improving Sleep  
☐ Improving Appetite  
☐ Reducing the need for other medications  
☐ Other  
( select all that apply)

On a scale from 0-100, how effective do you feel cannabis was at providing recreation/enjoyment?

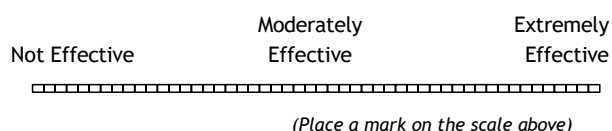

On a scale from 0-100, how effective do you feel cannabis was at reducing pain?

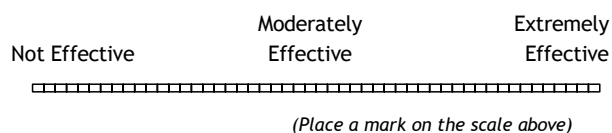

On a scale from 0-100, how effective do you feel cannabis was at reducing spasticity?

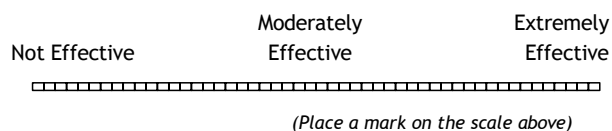

On a scale from 0-100, how effective do you feel cannabis was at reducing nausea?

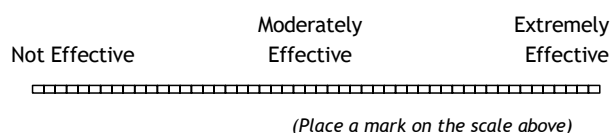

On a scale from 0-100, how effective do you feel cannabis was at reducing stress / anxiety?

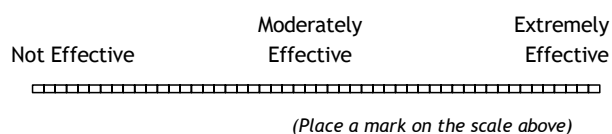

On a scale from 0-100, how effective do you feel cannabis was at reducing depression?

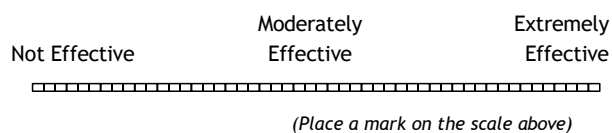

On a scale from 0-100, how effective do you feel cannabis was at improving sleep?

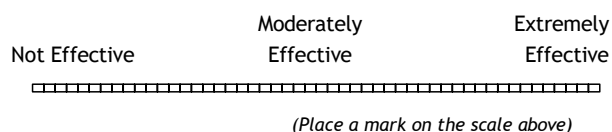

On a scale from 0-100, how effective do you feel cannabis was at improving appetite?

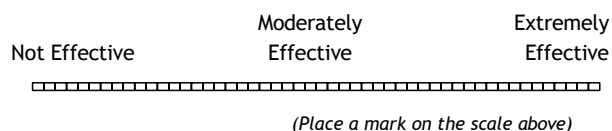

---

On a scale from 0-100, how effective do you feel cannabis was at reducing the need for other medications?

Not Effective                      Moderately Effective                      Extremely Effective

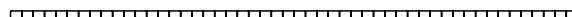

(Place a mark on the scale above)

---

What 'other' purpose did you use cannabis for?

---

---

On a scale from 0-100, how effective do you feel cannabis was at improving [preeffectiveness\_10]?

Not Effective                      Moderately Effective                      Extremely Effective

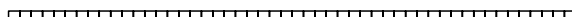

(Place a mark on the scale above)

---

Do you feel cannabis was more effective than other medications for your purpose(s)?

- ☐ Yes  
☐ No

---

What form(s) of cannabis did you use prior to your injury?

- ☐ Smoking  
☐ Vaping  
☐ Edibles  
☐ Topical (applied to skin)  
☐ Tincture (liquid spray)  
☐ Nabilone  
☐ Other  
(select all that apply)

---

Did you ever experience any negative side effects from cannabis use prior to your injury?

- ☐ None  
☐ Fatigue  
☐ Weight Gain  
☐ Heart Palpitations  
☐ Nausea  
☐ Low Blood Pressure  
☐ Paranoia  
☐ Reduced Motivation  
☐ Reduced Physical Capabilities  
☐ Other  
(select all that apply)

---

What was the primary reason(s) you did not use cannabis prior to your injury?

- ☐ Cost / Too expensive  
☐ Negative health implications  
☐ Social stigma / Fear of judgement  
☐ Dislike taste / smell  
☐ Illegal (at the time)  
☐ Unsure how to obtain cannabis  
☐ Other  
(select all that apply)

## Post-Injury Cannabis Use

Have you used cannabis since your injury?

- ☐ Yes  
☐ No

Since your injury, how often do you use cannabis?

- ☐ Daily  
☐ Weekly  
☐ Monthly  
☐ Rarely  
☐ I have used cannabis since my injury but no longer use it

Since your injury, for what purpose(s) have you used cannabis?

- ☐ Recreation / Enjoyment  
☐ Reducing pain  
☐ Reducing spasticity  
☐ Reducing nausea  
☐ Reducing stress / anxiety  
☐ Reducing depression  
☐ Improving sleep  
☐ Improving appetite  
☐ Reducing need for other medications  
☐ Other  
(select all that apply)

On a scale from 0-100, how effective do you feel cannabis is at improving recreation / enjoyment?

Not Effective                      Moderately Effective                      Extremely Effective

=====

(Place a mark on the scale above)

On a scale from 0-100, how effective do you feel cannabis is at reducing pain?

Not Effective                      Moderately Effective                      Extremely Effective

=====

(Place a mark on the scale above)

On a scale from 0-100, how effective do you feel cannabis is at reducing spasticity?

Not Effective                      Moderately Effective                      Extremely Effective

=====

(Place a mark on the scale above)

On a scale from 0-100, how effective do you feel cannabis is at reducing nausea?

Not Effective                      Moderately Effective                      Extremely Effective

=====

(Place a mark on the scale above)

On a scale from 0-100, how effective do you feel cannabis is at reducing stress / anxiety?

Not Effective                      Moderately Effective                      Extremely Effective

=====

(Place a mark on the scale above)

On a scale from 0-100, how effective do you feel cannabis is at reducing depression?

Not Effective                      Moderately Effective                      Extremely Effective

=====

(Place a mark on the scale above)

On a scale from 0-100, how effective do you feel cannabis is at improving sleep?

Not Effective                      Moderately Effective                      Extremely Effective

=====

(Place a mark on the scale above)

---

On a scale from 0-100, how effective do you feel cannabis is at improving appetite?

Not Effective                      Moderately Effective                      Extremely Effective

=====

(Place a mark on the scale above)

---

On a scale from 0-100, how effective do you feel cannabis is at reducing the need for other medications?

Not Effective                      Moderately Effective                      Extremely Effective

=====

(Place a mark on the scale above)

---

What 'other' purpose did you use cannabis for?

\_\_\_\_\_

---

On a scale from 0-100, how effective do you feel cannabis was at improving [posteffectiveness\_10]?

Not Effective                      Moderately Effective                      Extremely Effective

=====

(Place a mark on the scale above)

---

Do you feel cannabis was more effective than other medications for your purpose(s)?

☐ Yes    ☐ No

---

Since your injury, what form(s) of cannabis have you used?

- ☐ Smoking
  - ☐ Vaping
  - ☐ Edibles
  - ☐ Topical (applied to skin)
  - ☐ Tincture (liquid spray)
  - ☐ Nabilone
  - ☐ Other
- (select all that apply)
- 

Since your injury have you experienced any negative side effects from cannabis use?

- ☐ None
  - ☐ Fatigue
  - ☐ Weight gain
  - ☐ Heart palpitations
  - ☐ Nausea
  - ☐ Low blood pressure
  - ☐ Paranoia
  - ☐ Reduced motivation
  - ☐ Reduced physical capabilities
  - ☐ Other
- (select all that apply)
- 

What is the primary reason(s) you have not used cannabis since you injury?

- ☐ Cost / too expensive
  - ☐ Negative health implications
  - ☐ Social stigma / fear of judgment
  - ☐ Dislike taste / smell
  - ☐ Illegal (at the time)
  - ☐ Unsure how to obtain cannabis
  - ☐ Other
- ( select all that apply)
